# Supplementary material for: LncRNA OTUD6B-AS1 promotes paclitaxel resistance in triple negative breast cancer by regulation of miR-26a-5p/MTDH pathway-mediated autophagy and genomic instability
Source: publisher site journal article supplement (doi:10.18632/aging.203672), 2021-11-05
Supplement: Supplementary file [file aging-v13i21-203672-supplementary-material-SD1.pdf]

**SUPPLEMENTARY FIGURES**

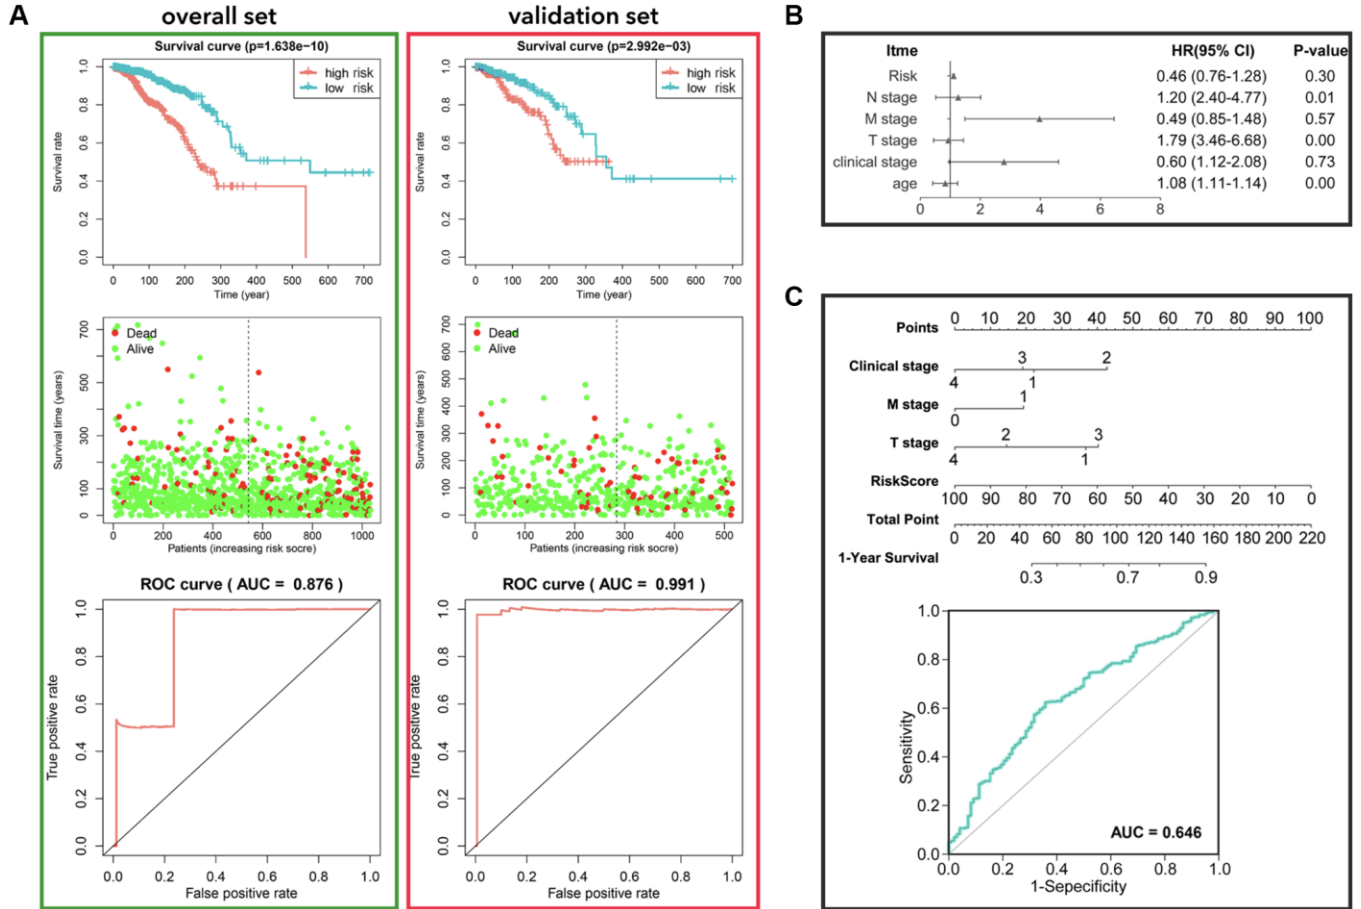

**Supplementary Figure 1. The predict model of prognosis in breast cancer.** (A) Breast samples from TCGA were divided into training group and validation group. 22 identified miRNA were analyzed to establish prognosis predict model. (B) Multivariate logistics regression analysis screened the independent risk factors. (C) Establishing a nomogram by R, and the ROC value was 0.646.

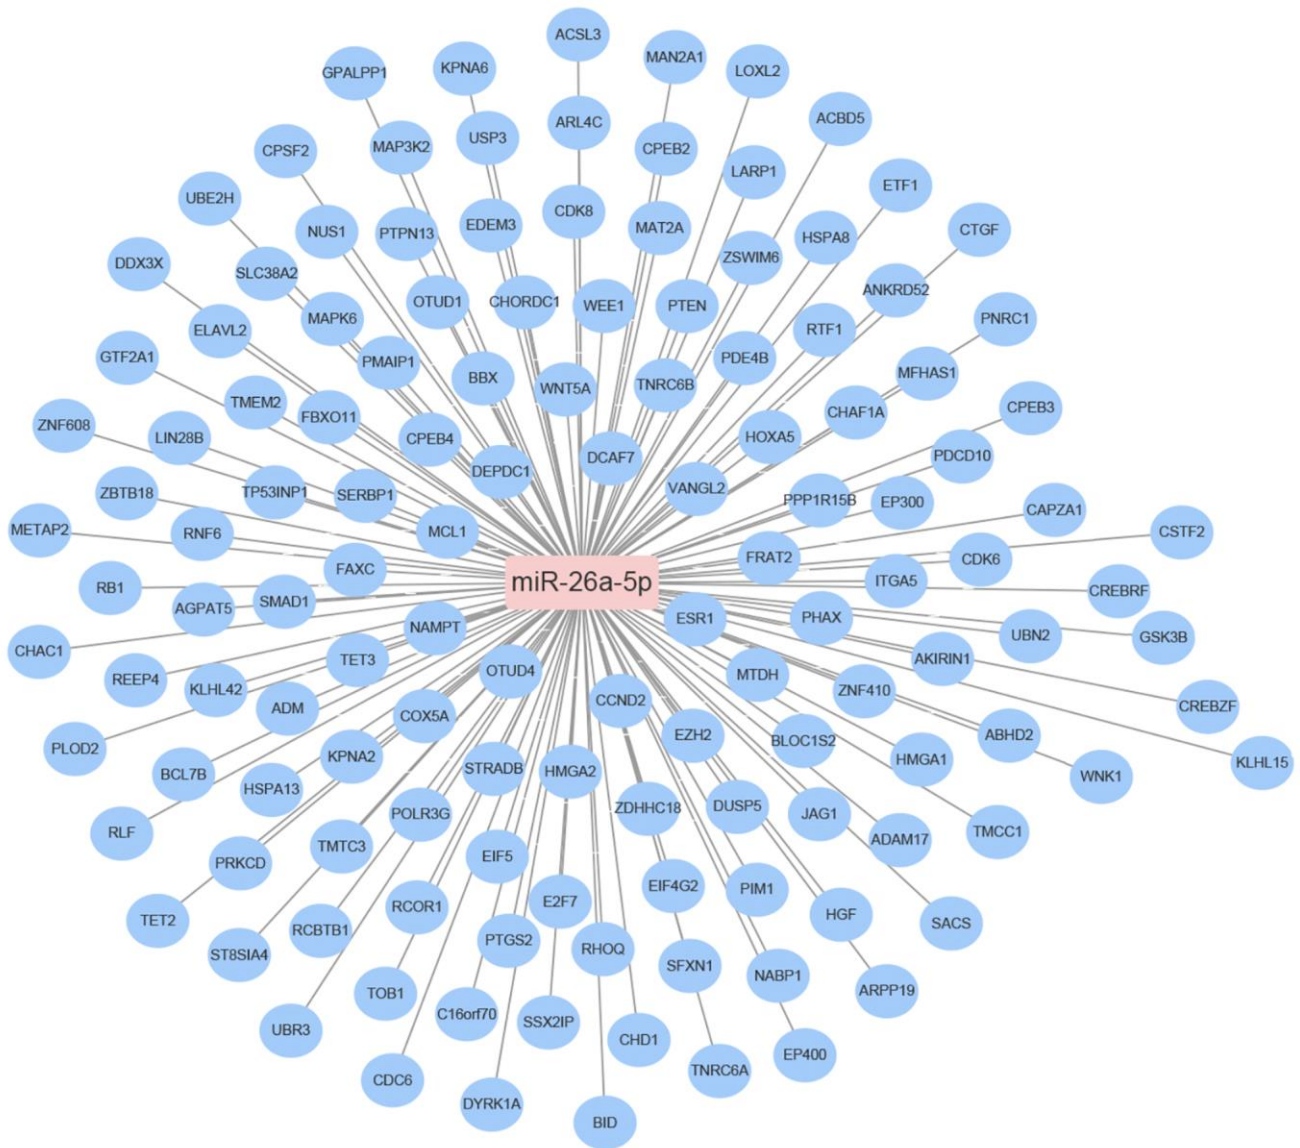

**Supplementary Figure 2. The targeted genes of miR-26a-5p.** 133 targeted genes of miR-26a-5p were identified by miRDB, miRTarBase and TargetScan database.

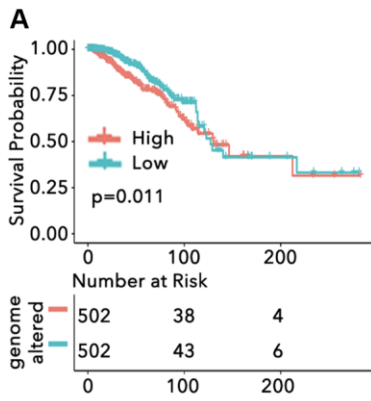

| let-7b-3p |         |          |
|-----------|---------|----------|
| DDR       | R-value | p-value  |
| PPP4C     | -0.2334 | 3.40E-14 |
| SEM1      | -0.2297 | 8.69E-14 |
| POLD1     | -0.2247 | 3.05E-13 |
| RECQL4    | -0.2216 | 6.56E-13 |
| RFC2      | -0.2177 | 1.66E-12 |
| MSH3      | 0.2342  | 2.75E-14 |
| RAD50     | 0.2527  | 1.89E-16 |
| POLR2A    | 0.2551  | 9.40E-17 |
| XPA       | 0.2667  | 3.25E-18 |
| CCNH      | 0.2826  | 2.39E-20 |

59 negative co-expression  
36 positive co-expression

| miR-26a-5p |         |          |
|------------|---------|----------|
| DDR        | R-value | p-value  |
| POLM       | 0.2556  | 8.30E-17 |
| POLL       | 0.2636  | 8.10E-18 |
| PARP3      | 0.2723  | 5.92E-19 |
| NEIL1      | 0.3143  | 5.09E-25 |
| RAD51      | -0.2682 | 2.05E-18 |
| MSH6       | -0.2646 | 6.12E-18 |
| NEIL3      | -0.2603 | 2.10E-17 |
| TDG        | -0.2416 | 3.91E-15 |
| XRCC5      | -0.2384 | 9.12E-15 |
| PRKDC      | -0.2355 | 1.95E-14 |

69 negative co-expression  
26 positive co-expression

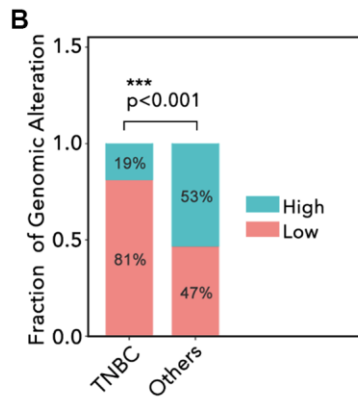

| miR-151a-5p |         |          |
|-------------|---------|----------|
| DDR         | R-value | p-value  |
| PARP3       | -0.3221 | 2.85E-26 |
| PCNA        | 0.3268  | 4.89E-27 |
| NEIL3       | 0.338   | 6.52E-29 |
| PRKDC       | 0.3474  | 1.45E-30 |
| POLR2K      | 0.3724  | 3.31E-35 |
| RAD51       | 0.3769  | 4.42E-36 |
| RAD54B      | 0.378   | 2.75E-36 |
| ELOC        | 0.3951  | 8.67E-40 |
| RAD54L      | 0.4104  | 4.53E-43 |
| RECQL4      | 0.4313  | 7.11E-48 |

20 negative co-expression  
85 positive co-expression

**Supplementary Figure 3. The effect of genomic instability in breast cancer.** (A) K–M analysis of prognosis grouped by genomic instability. (B) The genomic instability of subtypes of breast cancer. Displaying DDR-associated genes which were co-expressed with let-7b-3p, miR-151a-5p and miR-26a-5p.
